# Supplementary material for: The Immune Profile of Major Dysmood Disorder: Proof of Concept and Mechanism Using the Precision Nomothetic Psychiatry Approach
Source: MDPI journal article supplement (doi:10.3390/cells11071183), 2022-03-31
Supplement: s1 [file s1]

## Supplementary Materials

# The Immune Profile of Major Dysmood Disorder: Proof of Concept and Mechanism Using the Precision Nomothetic Psychiatry Approach

Michael Maes <sup>1,2,3,\*</sup>, Muanpetch Rachayon <sup>1</sup>, Ketsupar Jirakran <sup>1,4</sup>, Pimpayao Sodsai <sup>5,6</sup>, Siriwan Klinchanhom <sup>5,6</sup>, Piotr Galecki <sup>7</sup>, Atapol Sughondhabirrom <sup>1</sup> and Agnieszka Basta-Kaim <sup>8</sup>

<sup>1</sup> Department of Psychiatry, Faculty of Medicine, Chulalongkorn University and King Chulalongkorn Memorial Hospital, The Thai Red Cross Society, Bangkok 10330, Thailand; muanpetch.mp@gmail.com (M.R.); 6271001030@student.chula.ac.th (K.J.); atapol.s@gmail.com (A.S.)

<sup>2</sup> IMPACT Strategic Research Center, Barwon Health, Deakin University, Geelong VIC 3220, Australia

<sup>3</sup> Department of Psychiatry, Medical University of Plovdiv, 4002 Plovdiv, Bulgaria

<sup>4</sup> Maximizing Thai Children's Developmental Potential Research Unit, Department of Pediatrics, Faculty of Medicine, Chulalongkorn University, Bangkok 10330, Thailand

<sup>5</sup> Center of Excellence in Immunology and Immune-Mediated Diseases, Department of Microbiology, Faculty of Medicine, Chulalongkorn University, Bangkok 10330, Thailand; yokpim@gmail.com (P.S.); siriwanklinchanhom@gmail.com (S.K.)

<sup>6</sup> Department of Microbiology, Division of Immunology, Faculty of Medicine, Chulalongkorn University, Bangkok 10330, Thailand

<sup>7</sup> Department of Adult Psychiatry, Medical University of Lodz, 91-229 Lodz, Poland; piotr.galecki@umed.lodz.pl

<sup>8</sup> Laboratory of Immunoendocrinology, Department of Experimental Neuroendocrinology, Polish Academy of Sciences, 31-343 Kraków, Poland; basta@if-pan.krakow.pl

\* Correspondence: dr.michaelmaes@hotmail.com

**Supplementary Table S1.** Cytokine, chemokines and growth factors examined in the current study

| <b>Protein Abbreviations</b> | <b>Protein Name</b>                                                              | <b>Gene Symbol</b> | <b>Number of Samples that Lower than Sensitivity of the assay (%)</b> |
|------------------------------|----------------------------------------------------------------------------------|--------------------|-----------------------------------------------------------------------|
| IL-1 $\beta$                 | Interleukin-1 $\beta$                                                            | IL1B               | 0                                                                     |
| IL-1RA                       | Interleukin-1 receptor antagonist                                                | IL1RN              | 0                                                                     |
| IL-2                         | Interleukin-2                                                                    | IL2                | 0                                                                     |
| IL-4                         | Interleukin-4                                                                    | IL4                | 0                                                                     |
| IL-5                         | Interleukin-5                                                                    | IL5                | 0                                                                     |
| IL-6                         | Interleukin-6                                                                    | IL6                | 0                                                                     |
| IL-7                         | Interleukin-7                                                                    | IL7                | 62.5                                                                  |
| CXCL8                        | C-X-C motif chemokine ligand 8 (IL-8)                                            | CXCL8              | 0                                                                     |
| IL-9                         | Interleukin-9                                                                    | IL9                | 0                                                                     |
| IL-10                        | Interleukin-10                                                                   | IL10               | 0                                                                     |
| IL-12                        | Interleukin-12                                                                   | IL12               | 0.5                                                                   |
| IL-13                        | Interleukin-13                                                                   | IL13               | 30                                                                    |
| IL-15                        | Interleukin-15                                                                   | IL15               | 0                                                                     |
| IL-17                        | Interleukin-17                                                                   | IL17               | 0                                                                     |
| CCL11                        | Eotaxin                                                                          | CCL11              | 0                                                                     |
| FGF2                         | Fibroblast growth factor 2, Basic fibroblast growth factor                       | FGF2               | 0                                                                     |
| G-CSF                        | Granulocyte Colony Stimulating Factor, Colony Stimulating Factor 3 (Granulocyte) | CSF3               | 0                                                                     |
| GM-CSF                       | Granulocyte-macrophage colony-stimulating factor, Colony-stimulating factor 2    | CSF2               | 0                                                                     |
| IFN- $\gamma$                | Interferon- $\gamma$                                                             | IFNG               | 0                                                                     |
| CXCL10                       | C-X-C motif chemokine ligand 8, Interferon gamma-induced protein 10 (IP10)       | CXCL10             | 0                                                                     |
| CCL2                         | C-C Motif Chemokine Ligand 2 (MCP1)                                              | CCL2               | 0                                                                     |

|                       |                                                                                                            |       |   |
|-----------------------|------------------------------------------------------------------------------------------------------------|-------|---|
| CCL3 / MIP-1 $\alpha$ | Macrophage inflammatory protein-1 alpha, C-C Motif Chemokine Ligand 3                                      | CCL3  | 0 |
| PDGF                  | Platelet Derived Growth Factor Subunit A                                                                   | PDGFA | 0 |
| CCL4 / MIP-1 $\beta$  | C-C Motif Chemokine Ligand 4, Macrophage Inflammatory Protein 1-Beta, Lymphocyte Activation Gene 1 Protein | CCL4  | 0 |
| CCL5 /RANTES          | C-C Motif Chemokine Ligand 5, Regulated Upon Activation, Normally T-Expressed, And Presumably Secreted     | CCL5  | 0 |
| TNF- $\alpha$         | Tumor Necrosis Factor-Alpha                                                                                | TNF   | 0 |
| VEGF                  | Vascular Endothelial Growth Factor                                                                         | VEGFA | 0 |

Adapted from: [14].

**Supplementary Table S2.** Description of the immune profiles used in this study

| <b>Immune Profile</b> | <b>Members</b>                                                                                                                 |
|-----------------------|--------------------------------------------------------------------------------------------------------------------------------|
| <b>M1 macrophage</b>  | IL-1 $\beta$ , sIL-1RA, IL-6, TNF- $\alpha$ , CXCL8, CCL3                                                                      |
| <b>T helper-1</b>     | IL-2, IFN- $\gamma$ , IL-12                                                                                                    |
| <b>T helper-2</b>     | IL-4, IL-5, IL-9, IL-13                                                                                                        |
| <b>T helper-17</b>    | IL-6, IL-17                                                                                                                    |
| <b>IRS</b>            | IL-1 $\beta$ , IL-6, TNF- $\alpha$ , CXCL8, CCL3, IL-2, IFN- $\gamma$ , IL-12, IL-17, IL-15, G-CSF, GM-CSF, CXCL10, CCL5, CCL2 |
| <b>CIRS</b>           | IL-4, IL-10, sIL-1RA                                                                                                           |
| <b>Neurotoxicity</b>  | IL-1 $\beta$ , IL-6, TNF- $\alpha$ , CXCL8, CCL3, IL-2, IFN- $\gamma$ , IL-12, IL-17, CXCL10, CCL11, CCL5, CCL2                |
| <b>Growth factors</b> | FGF, PDGF, VEGF                                                                                                                |
| <b>T cell growth</b>  | IL4, IL9, IL12, GM-CSF, IL-15                                                                                                  |

IRS: immune-inflammatory response system; CIRS: compensatory immunoregulatory system

Adapted from: [14].
